# Supplementary material for: Three-dimensional Fe- and N-incorporated carbon structures as peroxidase mimics for fluorescence detection of hydrogen peroxide and glucose
Source: Royal Society of Chemistry journal article supplement (doi:10.1039/c5tb00413f), 2015-01-01
Supplement: c5tb00413f1.pdf [file c5tb00413f1.pdf]

Electronic Supplementary Information

**Three-Dimensional Fe- and N-Incorporated Carbon Structures as  
Peroxidase Mimics for Fluorescent Detection of Hydrogen Peroxide and  
Glucose**

Ruizhong Zhang<sup>a, b</sup>, Shuijian He<sup>a, b</sup>, Chunmei Zhang<sup>a, b</sup>, Wei Chen<sup>\*a</sup>

<sup>a</sup>State Key Laboratory of Electroanalytical Chemistry, Changchun Institute of Applied Chemistry, Chinese Academy of Sciences, Changchun, Jilin 130022, China

<sup>b</sup>University of Chinese Academy of Sciences, Beijing 100039, China

\*Corresponding author, Email: [weichen@ciac.ac.cn](mailto:weichen@ciac.ac.cn)

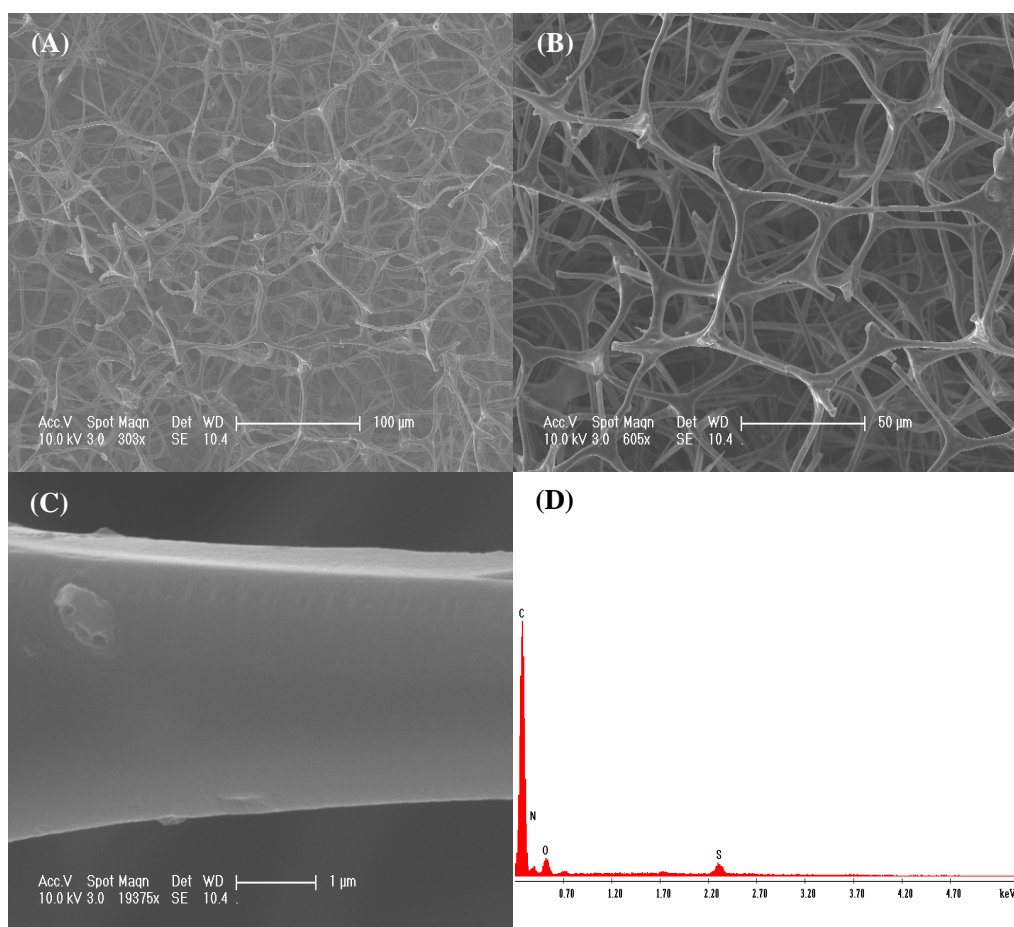

**Fig. S1** (A-C) SEM images of the carbonized melamine foams (CFs) at different magnifications. (D) EDS of the CFs.

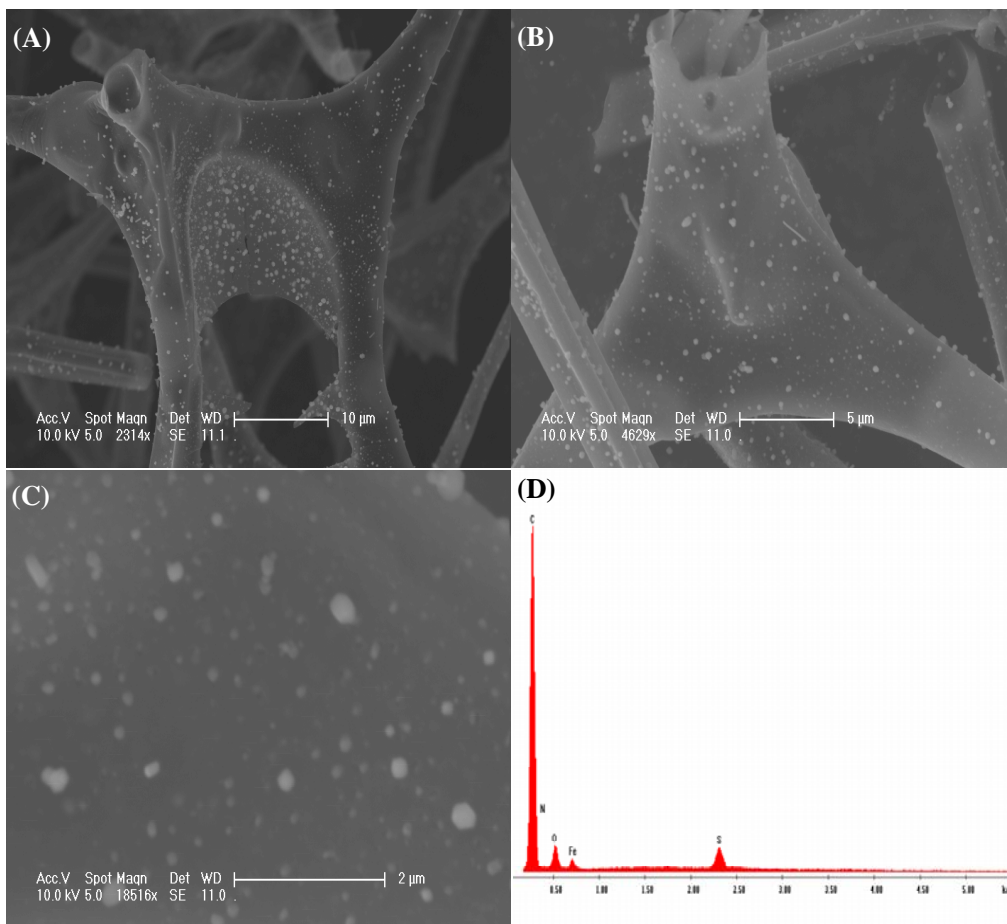

**Fig. S2** (A-C) SEM images of the product from thermolysis of iron salts impregnated melamine foams (Fe-CFs) at different magnifications. (D) EDS of the Fe-CFs.

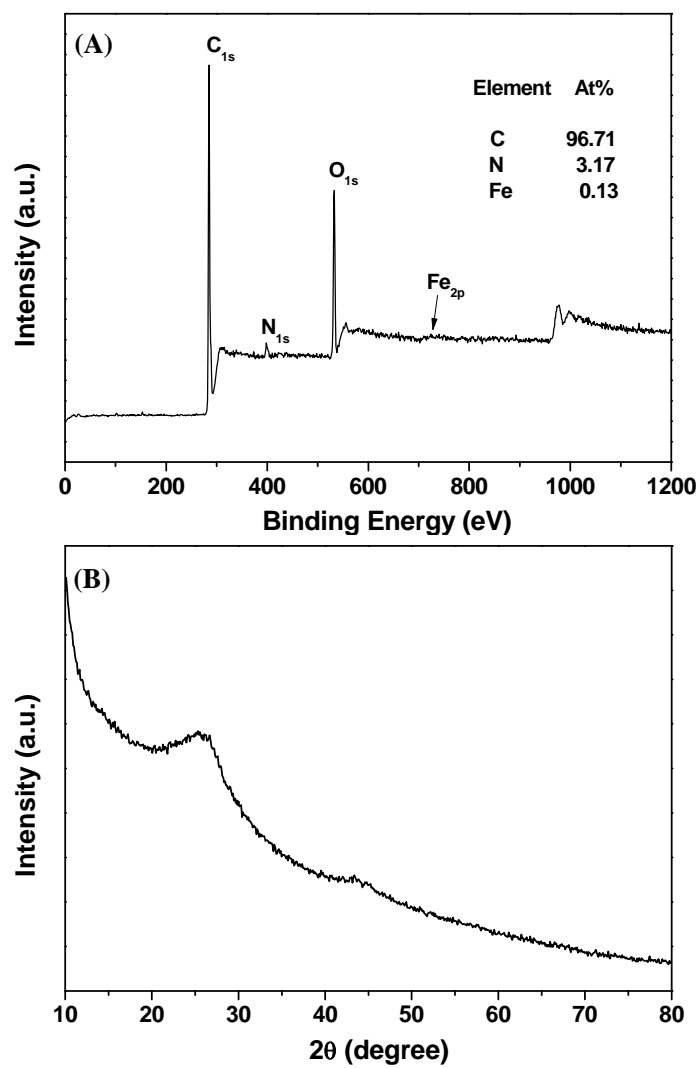

**Fig. S3** XPS survey spectra (A) and XRD pattern (B) of the Fe-Phen-CFs composite.

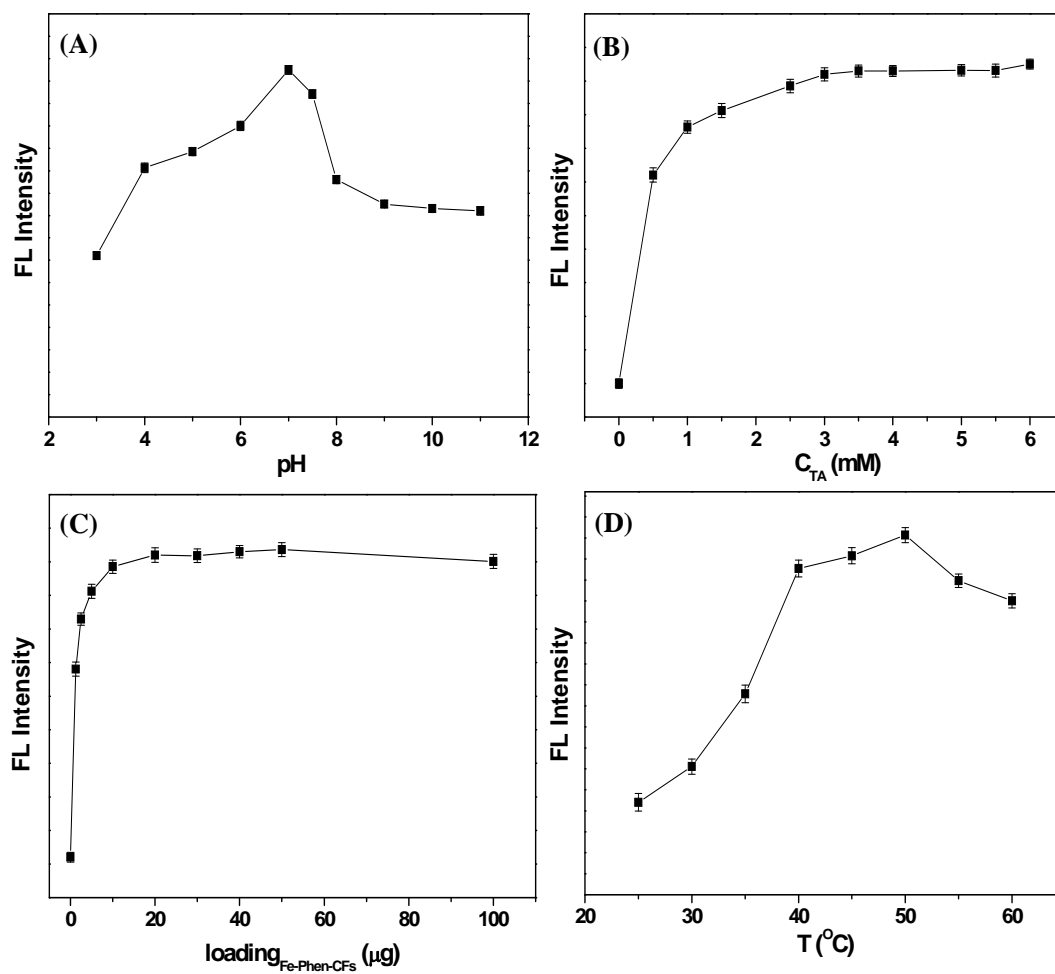

**Fig. S4** Effects of solution pH (A), TA concentration (B), the dose of Fe-Phen-CFs (C) and reaction temperature (D) on the fluorescence intensity, where the concentration of  $H_2O_2$  is 2 mM and the incubation time is 20 min.

**Table S1** Comparison of the analytical performances for H<sub>2</sub>O<sub>2</sub> detection by the present method and some reported fluorescent sensing systems

| Material                             | Linear range/ $\mu$ M | LOD/ $\mu$ M | Reference                                             |
|--------------------------------------|-----------------------|--------------|-------------------------------------------------------|
| <sup>a</sup> Fluorescence probe NP1  | —                     | 0.17         | <i>Anal.Chem.</i> 2014, 86, 9970-9976                 |
| <sup>b</sup> TPE probe               | 10-100                | 0.09         | <i>Biosens. Bioelectron.</i> 2015, 64, 542-546        |
| CuO nanoparticles                    | 5-200                 | 0.34         | <i>Biosens. Bioelectron.</i> 2014, 61, 374-378        |
| Tetraphenylethylene                  | 10-110                | 0.18         | <i>Tetrahedron Lett.</i> ,2014, 55, 1471-1474         |
| <sup>c</sup> P-GQDs                  | 1-20                  | 1            | <i>Part. Part. Syst. Charact.</i> 2013, 30, 1086-1092 |
| Fe <sub>3</sub> O <sub>4</sub>       | 0.04-8                | 0.008        | <i>Talanta</i> , 2014,130, 259-264                    |
| Fe <sub>3</sub> O <sub>4</sub> @CdTe | 50-1000               | 35           | <i>Anal. Methods</i> , 2014, 6, 6352-6357             |
| <sup>d</sup> PATb                    | 0.31-2560             | 0.15         | <i>Anal. Chim. Acta</i> ,2014, 834, 51-57             |
| Fe-Phen-CFs                          | 0.1-100               | 0.068        | Present work                                          |

<sup>a</sup>NP1: Fluorescence probe based on 1,8-naphthalimide and boric acid ester; <sup>b</sup>TPE: two-photon excitation; <sup>c</sup>P-GQDs: Graphene quantum dots prepared from pyrene; <sup>d</sup>PATb: phtalic acid/terbium

**Table S2** Comparison of the analytical performances for glucose detection by the present material and some reported fluorescent sensing materials

| Material                         | Linear range/ $\mu\text{M}$ | LOD/ $\mu\text{M}$ | Reference                                        |
|----------------------------------|-----------------------------|--------------------|--------------------------------------------------|
| B-GQDs <sup>a</sup>              | 100-10000                   | 30                 | <i>Anal.Chem.</i> 2014, 86,4423-4430             |
| Carbon dots                      | 9-900                       | 1.5                | <i>Anal.Chem.</i> 2014, 86,5323-5329             |
| GQDs                             | 100-10000                   | 5.0                | <i>Chem.Commun.</i> 2013, 49, 9830-9832          |
| CdTe/ZnTe/ZnS QDs                | 400-20000                   | 300                | <i>Angew. Chem., Int. Ed.</i> 2010,49, 6554-6558 |
| CdSe/ZnS QDs                     | 0-20000                     | 100                | <i>Chem.Commun.</i> 2009, 764-766                |
| CuO nanoparticles                | 3-100                       | 1                  | <i>Biosens. Bioelectron.</i> 2014, 61, 374-378   |
| BSA-Au nanoclusters <sup>b</sup> | 10-500                      | 5                  | <i>Biosens. Bioelectron.</i> 2011, 26, 1965-1969 |
| GQDs                             | 9-300                       | 0.1                | <i>Anal. Chim. Acta</i> 2014, 810, 71-78         |
| Fe-Phen-CFs                      | 0.5-200                     | 0.19               | This work                                        |

<sup>a</sup>B-GQDs: Boron-doped graphene quantum dots; <sup>b</sup>BSA: Bovine serum albumin
